# Supplementary material for: The Caenorhabditis elegans homolog of the Evi1 proto-oncogene, egl-43, coordinates G1 cell cycle arrest with pro-invasive gene expression during anchor cell invasion
Source: PubMed Central journal article supplement (PMC7117773; doi:10.1371/journal.pgen.1008470), 2020-03-23
Supplement: pgen.1008470.s014.pdf [file pgen.1008470.s014.pdf]

Response to Dr. Matus:

We have directly addressed your points in the relevant part of the discussion of the data (p.13, last para and p. 14, 1<sup>st</sup> para) and changed the model figure (Fig. 7) as recommended.

We now explicitly mention the difference between the *cki-1* transgene used in our study and the transgene used by Medwig-Kinney et al. [34], and discuss the possibility that a further increase in CKI-1 levels may also suppress the *egl-43* phenotype. On the other hand, the *cki-1* transgene we used did cause a robust suppression of the *nhr-67* but not the *egl-43* RNAi AC proliferation and invasion phenotypes (Fig. 3F,G). Hence, the model we propose is not black and white, but we rather suggest that *egl-43* is *less sensitive* than *nhr-67* to the increased *cki-1* dosage we used (p.14, end of 1<sup>st</sup> para).

Regarding a possible direct regulation of *cki-1* by EGL-43, the CHIP-seq peaks in the *cki-1* locus are in the 5' region, which is not sufficient for AC expression (Matus et al, 2015). Moreover, we did not observe a significant effect of *egl-43* RNAi on *cki-1* expression using an endogenous *cki-1::gfp* reporter (Deng et al. unpublished results). Therefore, we speculate that EGL-43 might regulate *cki-1* expression indirectly via NHR-67 (p. 14, end of 2<sup>nd</sup> para).
